# Supplementary material
Source: PubMed Central journal article supplement (PMC4403156)
Supplement: pnas.201415046SI.pdf [file pnas.201415046SI.pdf]

# Supporting Information

Liao and Weng 10.1073/pnas.1415046112

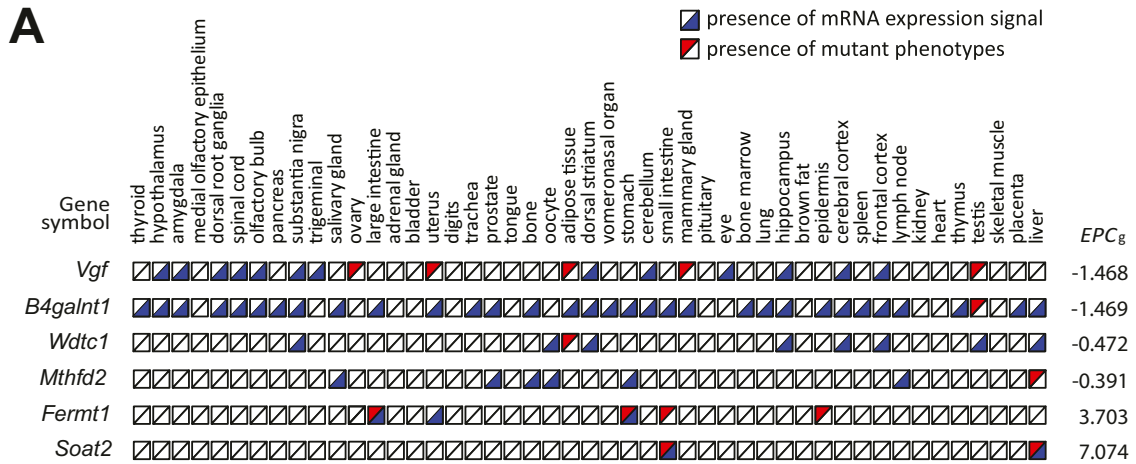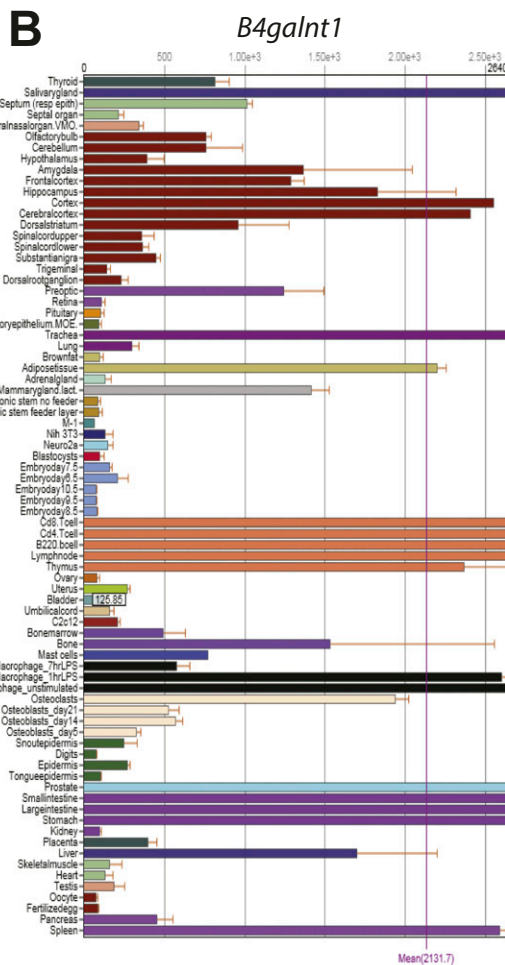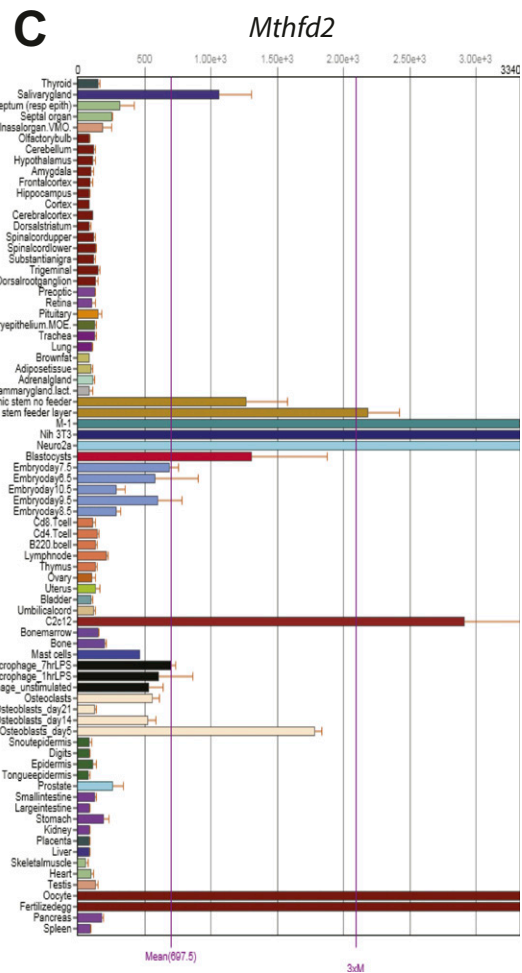

**Fig. S1.** (A) Expression profiles, phenotypic profiles, and  $EPC_t$  of VGF nerve growth factor inducible (*Vgf*), beta-1,4-N-acetyl-galactosaminyl transferase 1 gene (*B4galnt1*), WD and tetratricopeptide repeats 1 (*Wdtd1*), NAD-dependent methylenetetrahydrofolate dehydrogenase-methylenetetrahydrofolate cyclohydrolase gene (*Mthfd2*), fermitin family member 1 (*Fermt1*), and sterol O-acyltransferase 2 (*Soat2*) genes. The complete tissue expression profiles of *B4galnt1* (B) and *Mthfd2* (C) genes, obtained from dataset "GeneAtlas GNF1M, gcrma" of BioGPS ([biogps.org](http://biogps.org/)) are shown.

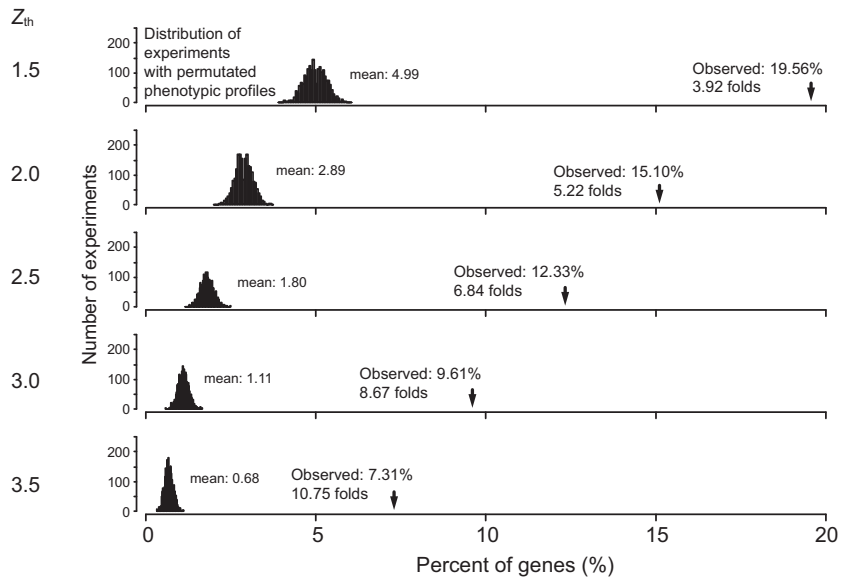

**Fig. S2.** Ratios of the percentage of mouse genes with  $EPC_g \geq Z_{th}$  ( $Z_{th} = 1.5, 2.0, 2.5, 3.0,$  or  $3.5$ ) to the percentage estimated from 2,500 experiments with permutated phenotypic profiles increases as the  $Z_{th}$  used increased.  $Z_{th}$ , the cutoff value used to define statistically significant expression-phenotype connection.

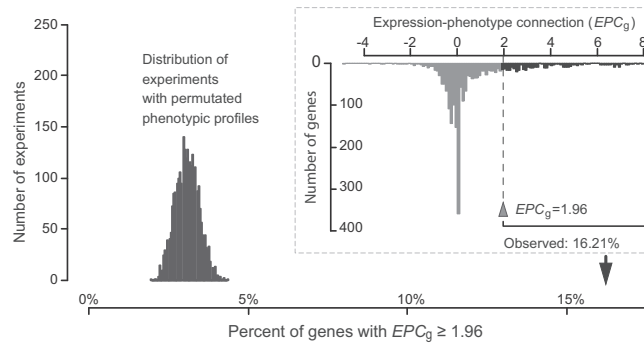

**Fig. S3.** Regenerated Fig. 1A using phenotypic entries of 2,532 genes obtained before the publication date of GeneAtlas v2.



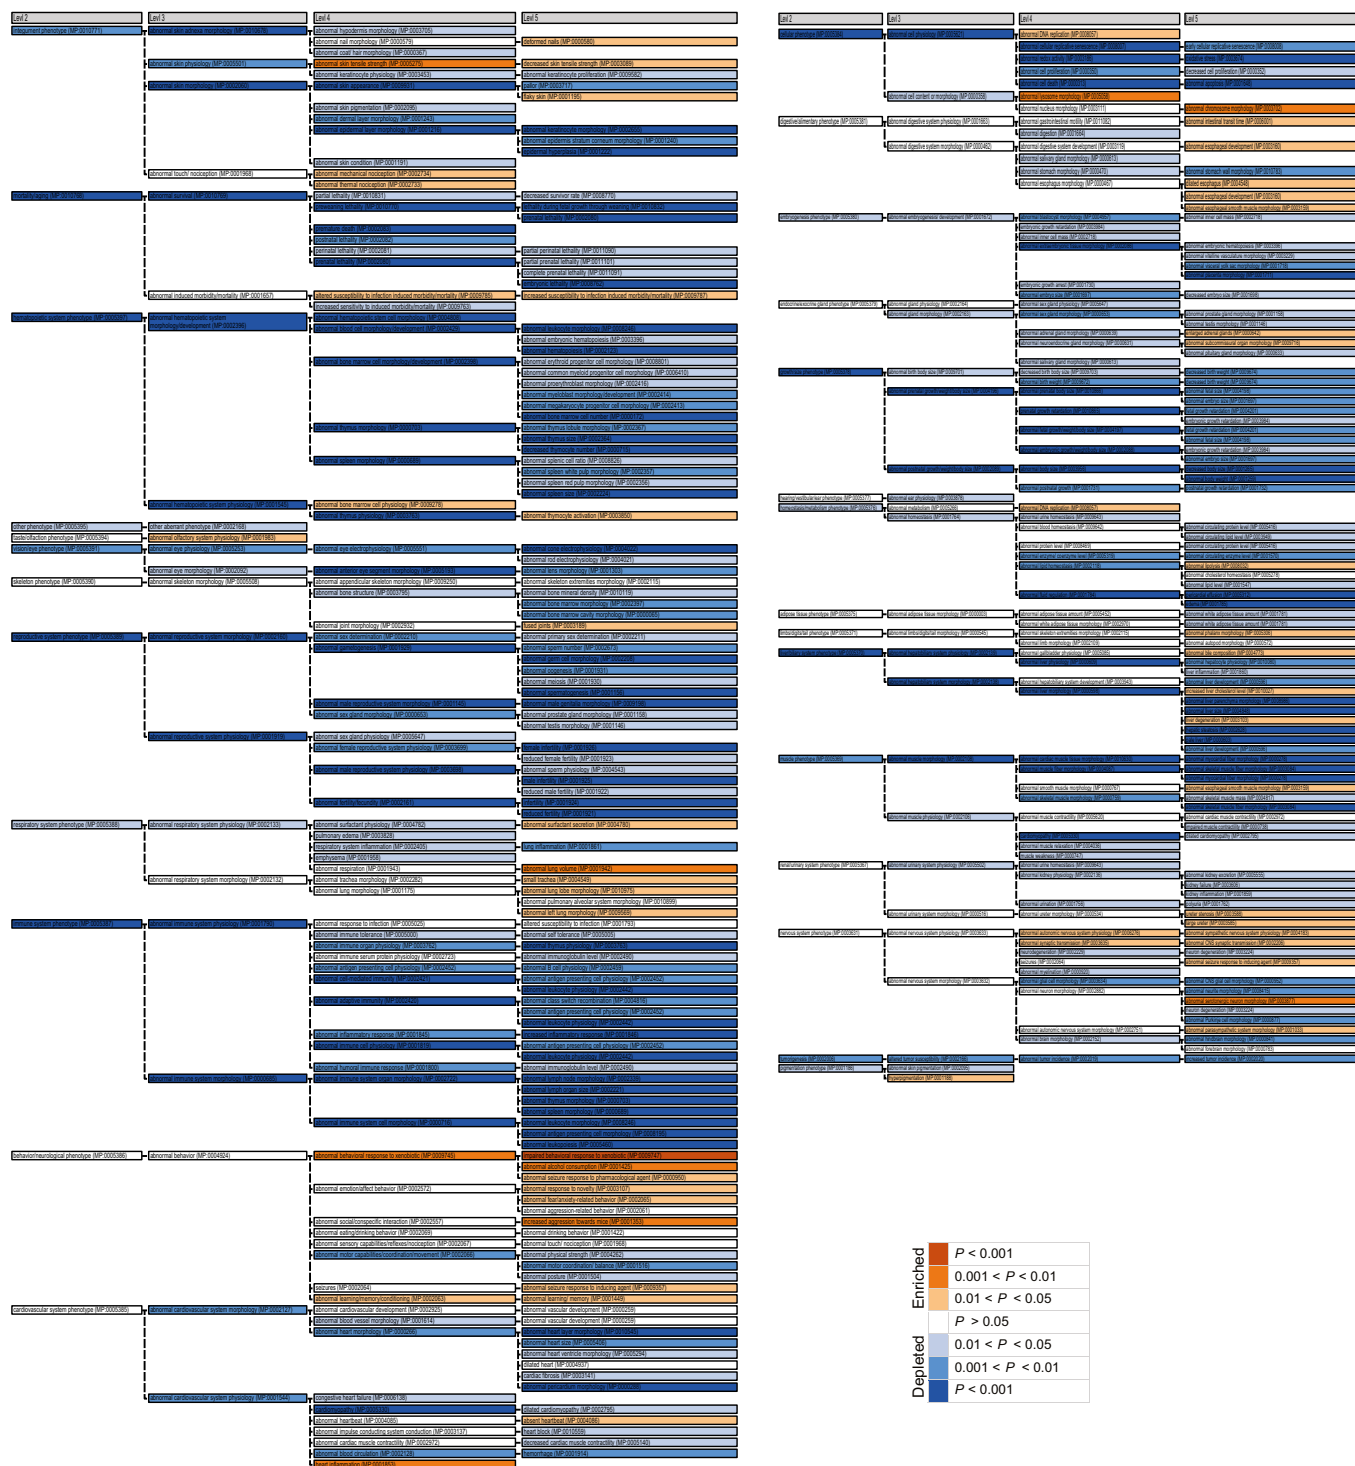

**Fig. S5.** Enriched/depleted phenotypes of mouse genes showing mutant phenotypes without a corresponding expression-expressed tissue (i.e., genes with  $N_{EP} = 0$ ,  $N_E > 0$ ,  $N_D > 0$ ) vs. genes with  $N_{EP} > 0$ . Analysis was conducted by Mammalian Phenotype Enrichment Analysis (MamPhEA, [evol.nhri.org.tw/MamPhEA](http://evol.nhri.org.tw/MamPhEA)) using default parameters.

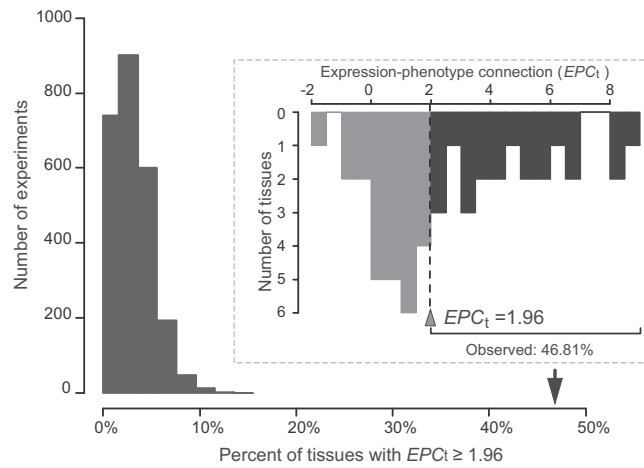

Fig. 56. Percentage of mouse tissues with  $EPC_t \geq 1.96$  was 46.81% (arrowhead from the distribution in the *Inset*) and was significantly greater than the percentage of mouse tissues with  $EPC_t \geq 1.96$  estimated from 2,500 experiments with permuted phenotypic profiles.

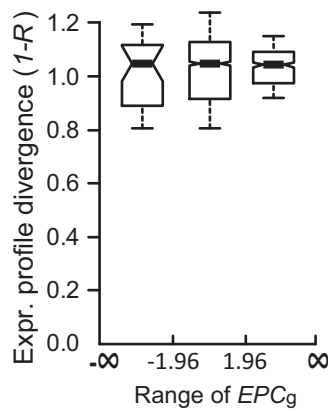

Fig. 57. Under the neutral model of transcriptome evolution, genes with higher  $EPC_g$  do not have more conserved gene expression (Expr.) profiles following the rodent-primate divergence. The  $1 - R$  values of human-mouse orthologs under the neutral model were calculated after randomizing the tissue expression profile of the human gene of each ortholog. The box plots show the distributions of  $1 - R$  for mouse genes with three different ranges of  $EPC_g$ . The values of the upper quartile, median, and lower quartile are indicated in each box, and the bars outside the box indicate semiquartile ranges.  $P$  values are from the Mann-Whitney  $U$  test.

**Table S1. Forty-seven mouse tissues profiled by Gene Atlas v2 oligonucleotide microarray experiments and their corresponding tissue names, presented as MA codes, in MGI for the records of mutant strain phenotyping**

| No. | Gene Atlas v2 tissues*                  | Corresponding tissues with MGI phenotypic code (MA code) |
|-----|-----------------------------------------|----------------------------------------------------------|
| 1   | Adipose tissue                          | Adipose tissue (MA:0000009)                              |
| 2   | Adrenal gland                           | Adrenal gland (MA:0000116)                               |
| 3   | Amygdala                                | Amygdala (MA:0000887)                                    |
| 4   | Bladder                                 | Urinary bladder (MA:0000380)                             |
| 5   | Bone                                    | Bone (MA:0001459)                                        |
| 6   | Bone marrow                             | Bone marrow (MA:0000134)                                 |
| 7   | Brown fat                               | Brown adipose tissue (MA:0000057)                        |
| 8   | Cerebellum                              | Cerebellum (MA:0000198)                                  |
| 9   | Cerebral cortex                         | Cerebral cortex (MA:0000185)                             |
| 10  | Digits                                  | Limb digit (MA:0000690)                                  |
| 11  | Dorsal root ganglia                     | Dorsal root ganglion (MA:0000232)                        |
| 12  | Dorsal striatum                         | Dorsal striatum (MA:0002971)                             |
| 13  | Epidermis                               | Epidermis (MA:0000153)                                   |
| 14  | Eye                                     | Eye (MA:0000261)                                         |
| 15  | Frontal cortex                          | Frontal cortex (MA:0000905)                              |
| 16  | Heart                                   | Heart (MA:0000072)                                       |
| 17  | Hippocampus                             | Hippocampus (MA:0000191)                                 |
| 18  | Hypothalamus                            | Hypothalamus (MA:0000173)                                |
| 19  | Kidney                                  | Kidney (MA:0000368)                                      |
| 20  | Large intestine                         | Large intestine (MA:0000333)                             |
| 21  | Liver                                   | Liver (MA:0000358)                                       |
| 22  | Lung                                    | Lung (MA:0000415)                                        |
| 23  | Lymph node                              | Lymph node (MA:0000139)                                  |
| 24  | Mammary gland                           | Mammary gland (MA:0000145)                               |
| 25  | Medial olfactory epithelium             | Nasal cavity olfactory epithelium (MA:0001325)           |
| 26  | Olfactory bulb                          | Main olfactory bulb (MA:0000194)                         |
| 27  | Oocyte                                  | Oocyte (MA:0000388)                                      |
| 28  | Ovary                                   | Ovary (MA:0000384)                                       |
| 29  | Pancreas                                | Pancreas (MA:0000120)                                    |
| 30  | Pituitary                               | Pituitary gland (MA:0000176)                             |
| 31  | Placenta                                | Placenta (MA:0000386)                                    |
| 32  | Prostate                                | Prostate gland (MA:0000404)                              |
| 33  | Salivary gland                          | Salivary gland (MA:0000346)                              |
| 34  | Skeletal muscle                         | Skeletal muscle tissue (MA:0002439)                      |
| 35  | Small intestine                         | Small intestine (MA:0000337)                             |
| 36  | Spinal cord lower and spinal cord upper | Spinal cord (MA:0000216)                                 |
| 37  | Spleen                                  | Spleen (MA:0000141)                                      |
| 38  | Stomach                                 | Stomach (MA:0000353)                                     |
| 39  | Substantia nigra                        | Substantia nigra (MA:0000210)                            |
| 40  | Testis                                  | Testis (MA:0000411)                                      |
| 41  | Thymus                                  | Thymus (MA:0000142)                                      |
| 42  | Thyroid                                 | Thyroid gland (MA:0000129)                               |
| 43  | Tongue                                  | Tongue (MA:0000347)                                      |
| 44  | Trachea                                 | Trachea (MA:0000441)                                     |
| 45  | Trigeminal                              | Trigeminal V nerve (MA:0001100)                          |
| 46  | Uterus                                  | Uterus (MA:0000389)                                      |
| 47  | Vomer nasal organ                       | Vomer nasal organ (MA:0000289)                           |

The substructures of each tissue (in MA codes) and the associated phenotypic codes (in MP IDs) are available as Dataset S1. MA, Mouse Anatomy.

\*Tissues profiled by Gene Atlas v2 but not included in the present study due to the lack of a corresponding MGI MA code are "B220<sup>+</sup> B cells," "blastocysts," "CD4<sup>+</sup> T cells," "CD8<sup>+</sup> T cells," "embryo day 6.5," "embryo day 7.5," "embryo day 8.5," "embryo day 9.5," "embryo day 10.5," "fertilized egg," "preoptic," "snout epidermis," and "umbilical cord."

**Table S2. Results of hypergeometric tests in searching for tissues with enriched mutant phenotypes for a given gene set, defined as genes expressed in the tissue indicated**

| Expressed tissue of the gene set ( <i>EPC</i> ) <sup>*</sup> | Tissue with enriched mutant phenotypes | <i>P</i> value after Bonferroni correction for multiple testing |
|--------------------------------------------------------------|----------------------------------------|-----------------------------------------------------------------|
| <b>Placenta (8.73)</b>                                       | <b>Placenta</b>                        | <b>3.36E-14</b>                                                 |
| Placenta (8.73)                                              | Heart                                  | 1.75E-08                                                        |
| Placenta (8.73)                                              | Liver                                  | 2.45E-05                                                        |
| <b>Liver (8.47)</b>                                          | <b>Liver</b>                           | <b>1.60E-14</b>                                                 |
| Liver (8.47)                                                 | Heart                                  | 9.10E-04                                                        |
| Liver (8.47)                                                 | Placenta                               | 5.39E-03                                                        |
| <b>Heart (8.17)</b>                                          | <b>Heart</b>                           | <b>3.53E-13</b>                                                 |
| Heart (8.17)                                                 | Liver                                  | 1.33E-04                                                        |
| <b>Thymus (6.91)</b>                                         | <b>Thymus</b>                          | <b>1.75E-08</b>                                                 |
| Thymus (6.91)                                                | Thyroid                                | 2.42E-06                                                        |
| Thymus (6.91)                                                | Bone marrow                            | 2.50E-06                                                        |
| Thymus (6.91)                                                | Spleen                                 | 5.38E-04                                                        |
| Thymus (6.91)                                                | Liver                                  | 9.18E-04                                                        |
| Thymus (6.91)                                                | Placenta                               | 1.49E-03                                                        |
| <b>Bone marrow (6.74)</b>                                    | <b>Bone marrow</b>                     | <b>2.04E-08</b>                                                 |
| Bone marrow (6.74)                                           | Heart                                  | 3.14E-05                                                        |
| Bone marrow (6.74)                                           | Liver                                  | 1.99E-03                                                        |
| <b>Testis (6.47)</b>                                         | <b>Testis</b>                          | <b>3.69E-07</b>                                                 |
| Testis (6.47)                                                | Placenta                               | 1.75E-03                                                        |
| Skeletal muscle (5.61)                                       | Heart                                  | 6.08E-06                                                        |
| <b>Skeletal muscle (5.61)</b>                                | <b>Skeletal muscle</b>                 | <b>3.93E-05</b>                                                 |
| Skeletal muscle (5.61)                                       | Liver                                  | 1.64E-03                                                        |
| <b>Cerebellum (5.55)</b>                                     | <b>Cerebellum</b>                      | <b>4.64E-05</b>                                                 |
| Epidermis (5.44)                                             | Heart                                  | 7.93E-07                                                        |
| <b>Epidermis (5.44)</b>                                      | <b>Epidermis</b>                       | <b>1.26E-04</b>                                                 |
| Epidermis (5.44)                                             | Liver                                  | 5.39E-03                                                        |
| <b>Eye (5.4)</b>                                             | <b>Eye</b>                             | <b>7.50E-05</b>                                                 |
| Eye (5.4)                                                    | Heart                                  | 1.05E-03                                                        |
| Spleen (4.86)                                                | Bone marrow                            | 6.24E-04                                                        |
| <b>Spleen (4.86)</b>                                         | <b>Spleen</b>                          | <b>2.94E-03</b>                                                 |
| Spleen (4.86)                                                | Liver                                  | 2.38E-02                                                        |
| Lymph node (4.41)                                            | Spleen                                 | 5.09E-11                                                        |
| Lymph node (4.41)                                            | Bone marrow                            | 1.34E-07                                                        |
| Lymph node (4.41)                                            | Thymus                                 | 1.51E-05                                                        |
| Lymph node (4.41)                                            | Liver                                  | 5.32E-05                                                        |
| Lymph node (4.41)                                            | Thyroid                                | 1.71E-04                                                        |
| Lymph node (4.41)                                            | Heart                                  | 5.02E-03                                                        |
| <b>Lymph node (4.41)</b>                                     | <b>Lymph node</b>                      | <b>1.31E-02</b>                                                 |
| Brown fat (4.2)                                              | Heart                                  | 2.45E-08                                                        |
| Brown fat (4.2)                                              | Liver                                  | 6.48E-06                                                        |
| Brown fat (4.2)                                              | Skeletal muscle                        | 4.19E-02                                                        |
| Kidney (3.95)                                                | Liver                                  | 3.46E-06                                                        |
| Kidney (3.95)                                                | Heart                                  | 2.51E-03                                                        |
| Kidney (3.95)                                                | Placenta                               | 1.07E-02                                                        |
| Hippocampus (3.78)                                           | Cerebellum                             | 6.77E-03                                                        |
| Small intestine (3.29)                                       | Liver                                  | 1.53E-05                                                        |
| Small intestine (3.29)                                       | Placenta                               | 8.76E-03                                                        |
| Lung (3.21)                                                  | Heart                                  | 3.41E-12                                                        |
| Lung (3.21)                                                  | Liver                                  | 1.37E-05                                                        |
| Lung (3.21)                                                  | Placenta                               | 4.74E-05                                                        |
| Lung (3.21)                                                  | Bone marrow                            | 2.89E-02                                                        |
| Pituitary (3.03)                                             | Liver                                  | 5.68E-03                                                        |
| Pituitary (3.03)                                             | Heart                                  | 3.85E-02                                                        |
| Bladder (2.32)                                               | Heart                                  | 1.41E-07                                                        |
| Bladder (2.32)                                               | Placenta                               | 4.94E-04                                                        |
| Bladder (2.32)                                               | Liver                                  | 1.43E-02                                                        |
| Oocyte (2.29)                                                | Heart                                  | 2.53E-03                                                        |
| Oocyte (2.29)                                                | Placenta                               | 2.63E-03                                                        |
| Stomach (2.21)                                               | Heart                                  | 6.48E-06                                                        |
| Stomach (2.21)                                               | Liver                                  | 4.20E-04                                                        |
| Stomach (2.21)                                               | Placenta                               | 3.83E-03                                                        |

**Table S2. Cont.**

| Expressed tissue of the gene set ( $EPC_t$ )* | Tissue with enriched mutant phenotypes | <i>P</i> value after Bonferroni correction for multiple testing |
|-----------------------------------------------|----------------------------------------|-----------------------------------------------------------------|
| Medial olfactory epithelium (1.95)            | Liver                                  | 2.04E-02                                                        |
| Bone (1.94)                                   | Bone marrow                            | 7.09E-11                                                        |
| Bone (1.94)                                   | Liver                                  | 1.00E-04                                                        |
| Bone (1.94)                                   | Heart                                  | 3.34E-04                                                        |
| Bone (1.94)                                   | Spleen                                 | 5.35E-03                                                        |
| Bone (1.94)                                   | Epidermis                              | 1.35E-02                                                        |
| Mammary gland (1.86)                          | Placenta                               | 3.68E-04                                                        |
| Mammary gland (1.86)                          | Liver                                  | 4.47E-04                                                        |
| Mammary gland (1.86)                          | Heart                                  | 2.18E-03                                                        |
| Trachea (1.64)                                | Heart                                  | 6.35E-04                                                        |
| Trachea (1.64)                                | Epidermis                              | 7.17E-04                                                        |
| Trachea (1.64)                                | Liver                                  | 7.96E-04                                                        |
| Trachea (1.64)                                | Bone marrow                            | 2.30E-03                                                        |
| Trachea (1.64)                                | Placenta                               | 3.48E-03                                                        |
| Trachea (1.64)                                | Spleen                                 | 3.73E-03                                                        |
| Digits (1.46)                                 | Epidermis                              | 4.59E-10                                                        |
| Digits (1.46)                                 | Heart                                  | 1.54E-03                                                        |
| Digits (1.46)                                 | Placenta                               | 5.01E-03                                                        |
| Adipose tissue (1.42)                         | Liver                                  | 9.01E-07                                                        |
| Adipose tissue (1.42)                         | Bone marrow                            | 8.48E-05                                                        |
| Adipose tissue (1.42)                         | Placenta                               | 1.23E-03                                                        |
| Adipose tissue (1.42)                         | Spleen                                 | 3.52E-03                                                        |
| Adipose tissue (1.42)                         | Heart                                  | 3.54E-03                                                        |
| Adipose tissue (1.42)                         | Thymus                                 | 1.66E-02                                                        |
| Uterus (1.39)                                 | Heart                                  | 9.96E-06                                                        |
| Uterus (1.39)                                 | Placenta                               | 1.37E-04                                                        |
| Uterus (1.39)                                 | Liver                                  | 2.53E-04                                                        |
| Vomeronasal organ (1.28)                      | Heart                                  | 4.83E-05                                                        |
| Vomeronasal organ (1.28)                      | Placenta                               | 3.23E-02                                                        |
| Adrenal gland (1.05)                          | Heart                                  | 2.01E-08                                                        |
| Adrenal gland (1.05)                          | Liver                                  | 8.88E-08                                                        |
| Adrenal gland (1.05)                          | Placenta                               | 1.09E-03                                                        |
| Tongue (1.01)                                 | Heart                                  | 5.11E-08                                                        |
| Tongue (1.01)                                 | Epidermis                              | 4.92E-05                                                        |
| Tongue (1.01)                                 | Liver                                  | 9.83E-03                                                        |
| Tongue (1.01)                                 | Placenta                               | 1.35E-02                                                        |
| Tongue (1.01)                                 | Skeletal muscle                        | 3.16E-02                                                        |
| Pancreas (0.92)                               | Heart                                  | 6.00E-03                                                        |
| Olfactory bulb (0.85)                         | Cerebellum                             | 6.22E-03                                                        |
| Olfactory bulb (0.85)                         | Hippocampus                            | 3.75E-02                                                        |
| Thyroid (0.79)                                | Heart                                  | 7.58E-03                                                        |
| Prostate (0.77)                               | Heart                                  | 8.42E-06                                                        |
| Prostate (0.77)                               | Liver                                  | 2.21E-04                                                        |
| Large intestine (0.3)                         | Placenta                               | 8.92E-03                                                        |
| Large intestine (0.3)                         | Heart                                  | 2.23E-02                                                        |
| Large intestine (0.3)                         | Liver                                  | 3.80E-02                                                        |
| Spinal cord (0.29)                            | Heart                                  | 1.11E-02                                                        |
| Spinal cord (0.29)                            | Cerebellum                             | 1.80E-02                                                        |
| Hypothalamus (0.24)                           | Cerebellum                             | 5.71E-03                                                        |
| Salivary gland (0.15)                         | Liver                                  | 7.57E-04                                                        |
| Salivary gland (0.15)                         | Heart                                  | 5.86E-03                                                        |
| Salivary gland (0.15)                         | Placenta                               | 9.70E-03                                                        |
| Dorsal root ganglia (0.04)                    | Heart                                  | 2.44E-02                                                        |
| Frontal cortex (-0.01)                        | Cerebellum                             | 1.49E-03                                                        |
| Ovary (-0.33)                                 | Heart                                  | 4.27E-07                                                        |
| Ovary (-0.33)                                 | Liver                                  | 9.26E-06                                                        |
| Ovary (-0.33)                                 | Placenta                               | 2.37E-05                                                        |
| Substantia nigra (-0.59)                      | Cerebellum                             | 8.76E-05                                                        |
| Dorsal striatum (-0.76)                       | Cerebellum                             | 7.37E-03                                                        |
| Amygdala (-1.75)                              | Cerebellum                             | 3.79E-03                                                        |

Only the results with a Bonferroni-corrected *P* value <0.05 are shown. The tests supporting a gene set expressed in a tissue with enrichment of abnormal phenotypes in the same tissue are highlighted in bold font.

\*Sorted by  $EPC_t$ .



**Table S3. Information on genes with mRNA in situ hybridization data used to produce Fig. 4**

| Theiler stage | Corresponding EMAP IDs (no. of genes* used to generate Fig. 4) |                      |
|---------------|----------------------------------------------------------------|----------------------|
|               | Eye                                                            | Heart                |
| TS12          | <b>EMAP:304 (3)</b>                                            | EMAP:315 (18)        |
| TS13          | <b>EMAP:540 (0)</b>                                            | <b>EMAP:560 (3)</b>  |
| TS14          | <b>EMAP:873 (8)</b>                                            | EMAP:897 (21)        |
| TS15          | EMAP:1285 (42)                                                 | EMAP:1317 (67)       |
| TS16          | EMAP:1786 (32)                                                 | EMAP:1827 (26)       |
| TS17          | EMAP:2364 (31)                                                 | EMAP:2411 (41)       |
| TS18          | EMAP:3003 (11)                                                 | EMAP:3056 (10)       |
| TS19          | <b>EMAP:3605 (9)</b>                                           | <b>EMAP:3666 (3)</b> |
| TS20          | EMAP:4327 (13)                                                 | <b>EMAP:4396 (1)</b> |
| TS21          | <b>EMAP:5201 (1)</b>                                           | <b>EMAP:5285 (0)</b> |
| TS23          | EMAP:7786 (438)                                                | EMAP:7907 (137)      |

Developmental stages with insufficient sample sizes (<10 genes) are marked with bold font and were not computed for stage-specific  $EPC_t$ .  
\*Genes with mRNA in situ hybridization data in the EMAGE database.

## Other Supporting Information Files

[Dataset S1 \(TXT\)](#)
